# Supplementary material for: Emotion Regulation as a Mechanism of Mindfulness in Individual Cognitive-Behavioral Therapy for Depression and Anxiety Disorders
Source: Hindawi journal article supplement (doi:10.1155/2024/9081139), 2024-04-02
Supplement: f1 [file 9081139.f1.pdf]

Supplementary Material

for

**Emotion Regulation as a Mechanism of Mindfulness in Individual Cognitive-Behavioral  
Therapy for Depression and Anxiety Disorders**

Luise Pruessner<sup>1</sup>, Christina Timm<sup>1</sup>, Julia Kalmar<sup>2</sup>, Hinrich Bents<sup>2</sup>, Sven Barnow<sup>1</sup>, Johannes Mander<sup>2</sup>

<sup>1</sup> Department of Psychology, Heidelberg University (Germany)

<sup>2</sup> Center for Psychological Psychotherapy, Heidelberg University (Germany)

**Author Note**

Luise Pruessner  <https://orcid.org/0000-0002-4796-9682>

Christina Timm  <https://orcid.org/0000-0002-3675-6163>

Julia Kalmar  <https://orcid.org/0000-0002-3952-9070>

Sven Barnow  <https://orcid.org/0009-0004-5359-9384>

Johannes Mander  <https://orcid.org/0000-0003-0358-1106>

The authors declare that they have no conflict of interest regarding the publication of this article. Data to replicate the results reported in this paper are available on request through the *Open Science Framework* (<https://osf.io/syk25/>). Correspondence should be addressed to Luise Pruessner, Department of Psychology, Heidelberg University, Hauptstr. 47-51, 69117 Heidelberg, Germany. Email: [luise.pruessner@psychologie.uni-heidelberg.de](mailto:luise.pruessner@psychologie.uni-heidelberg.de).

**Table S1**

*Multilevel Structural Equation Modeling with Coefficients for Total, Direct, and Indirect Effects of Rumination, Avoidance, and Suppression on Depressive Symptoms*

|                                         | Level 1 ( <i>within</i> ) |              |           |          |          | Level 2 ( <i>between</i> ) |               |           |          |          |
|-----------------------------------------|---------------------------|--------------|-----------|----------|----------|----------------------------|---------------|-----------|----------|----------|
|                                         | <i>Estimate</i>           | 95% CI       | <i>SE</i> | <i>z</i> | <i>p</i> | <i>Estimate</i>            | 95% CI        | <i>SE</i> | <i>z</i> | <i>p</i> |
| <b><i>Total effect (c)</i></b>          |                           |              |           |          |          |                            |               |           |          |          |
| Mindfulness → Depression                | -11.52                    | -13.75 -9.30 | 1.14      | -10.14   | < .001   | -15.46                     | -19.31 -11.61 | 1.96      | -7.87    | < .001   |
| <b><i>Indirect effects (ab)</i></b>     |                           |              |           |          |          |                            |               |           |          |          |
| Mindfulness → Rumination → Depression   | -1.09                     | -1.80 -0.39  | 0.36      | -3.03    | .002     | -2.81                      | -4.85 -0.78   | 1.04      | -2.71    | .007     |
| Mindfulness → Avoidance → Depression    | -0.06                     | -0.55 0.43   | 0.25      | -0.25    | .803     | 0.28                       | -1.29 1.85    | 0.80      | 0.35     | .725     |
| Mindfulness → Suppression → Depression  | -0.27                     | -0.63 0.09   | 0.18      | -1.47    | .142     | -2.48                      | -4.40 -0.57   | 0.98      | -2.55    | .011     |
| <b><i>Direct effects (c', a, b)</i></b> |                           |              |           |          |          |                            |               |           |          |          |
| Mindfulness → Depression                | -10.10                    | -12.43 -7.77 | 1.19      | -8.50    | < .001   | -10.44                     | -14.58 -6.30  | 2.11      | -4.94    | < .001   |
| Rumination → Depression                 | 1.26                      | 0.53 2.00    | 0.37      | 3.39     | < .001   | 4.83                       | 2.76 6.91     | 1.06      | 4.57     | < .001   |
| Avoidance → Depression                  | 0.10                      | -0.65 0.84   | 0.38      | 0.25     | .803     | -0.49                      | -3.21 2.23    | 1.39      | -0.35    | .723     |
| Suppression → Depression                | 0.76                      | -0.17 1.68   | 0.47      | 1.61     | .108     | 4.39                       | 1.78 7.00     | 1.33      | 3.30     | < .001   |
| Mindfulness → Rumination                | -0.86                     | -1.12 -0.61  | 0.13      | -6.65    | < .001   | -0.58                      | -0.93 -0.24   | 0.18      | -3.29    | < .001   |
| Mindfulness → Avoidance                 | -0.65                     | -0.93 -0.38  | 0.14      | -4.72    | < .001   | -0.57                      | -0.85 -0.28   | 0.15      | -3.88    | < .001   |
| Mindfulness → Suppression               | -0.36                     | -0.55 -0.16  | 0.10      | -3.57    | < .001   | -0.57                      | -0.88 -0.27   | 0.16      | -3.66    | < .001   |
| Model fit                               | AIC                       | BIC          | CFI       | RMSEA    | TLI      | SRMR                       |               |           |          |          |
|                                         | 7429.333                  | 7577.675     | 0.999     | 0.031    | 0.967    | 0.000                      | 0.014         |           |          |          |

*Note.* AIC = Akaike information criterion; BIC = Bayesian information criterion; RMSEA = Root-mean-square error of approximation; CFI = Comparative fit index; TLI = Tucker-Lewis-Index; SRMR = Standardized root-mean-square residual.

**Table S2**

*Multilevel Structural Equation Modeling with Coefficients for Total, Direct and Indirect Effects of Reappraisal, Acceptance, and Problem-Solving on Depressive Symptoms*

|                                            | Level 1 ( <i>within</i> ) |        |          |           |          | Level 2 ( <i>between</i> ) |                 |        |        |           |             |          |
|--------------------------------------------|---------------------------|--------|----------|-----------|----------|----------------------------|-----------------|--------|--------|-----------|-------------|----------|
|                                            | <i>Estimate</i>           | 95% CI |          | <i>SE</i> | <i>z</i> | <i>p</i>                   | <i>Estimate</i> | 95% CI |        | <i>SE</i> | <i>z</i>    | <i>p</i> |
| <b>Total effect (c)</b>                    |                           |        |          |           |          |                            |                 |        |        |           |             |          |
| Mindfulness → Depression                   | -11.53                    | -13.76 | -9.30    | 1.14      | -10.14   | < .001                     | -15.37          | -19.22 | -11.52 | 1.96      | -7.83       | < .001   |
| <b>Indirect effects (ab)</b>               |                           |        |          |           |          |                            |                 |        |        |           |             |          |
| Mindfulness → Reappraisal → Depression     | -0.73                     | -1.38  | -0.08    | 0.33      | -2.20    | .028                       | -0.84           | -1.62  | -0.06  | 0.40      | -2.10       | .036     |
| Mindfulness → Acceptance → Depression      | -0.70                     | -1.34  | -0.05    | 0.33      | -2.11    | .035                       | -0.59           | -1.33  | 0.15   | 0.38      | -1.55       | .120     |
| Mindfulness → Problem-Solving → Depression | 0.21                      | -0.19  | 0.61     | 0.21      | 1.02     | .310                       | 0.19            | -0.31  | 0.70   | 0.26      | 0.75        | .452     |
| <b>Direct effects (c', a, b)</b>           |                           |        |          |           |          |                            |                 |        |        |           |             |          |
| Mindfulness → Depression                   | -10.31                    | -12.64 | -7.98    | 1.19      | -8.67    | < .001                     | -10.45          | -12.84 | -8.06  | 1.22      | -8.57       | < .001   |
| Reappraisal → Depression                   | -1.00                     | -1.84  | -0.17    | 0.42      | -2.36    | .018                       | -1.13           | -2.11  | -0.15  | 0.50      | -2.26       | .024     |
| Acceptance → Depression                    | -0.90                     | -1.69  | -0.12    | 0.40      | -2.25    | .024                       | -0.75           | -1.66  | 0.16   | 0.46      | -1.61       | .107     |
| Problem-Solving → Depression               | 0.47                      | -0.41  | 1.36     | 0.45      | 1.05     | .293                       | 0.43            | -0.67  | 1.53   | 0.56      | 0.77        | .444     |
| Mindfulness → Reappraisal                  | 0.73                      | 0.49   | 0.97     | 0.12      | 5.89     | < .001                     | 0.74            | 0.49   | 0.99   | 0.13      | 5.77        | < .001   |
| Mindfulness → Acceptance                   | 0.77                      | 0.51   | 1.03     | 0.13      | 5.75     | < .001                     | 0.78            | 0.52   | 1.05   | 0.14      | 5.76        | < .001   |
| Mindfulness → Problem-Solving              | 0.44                      | 0.23   | 0.66     | 0.11      | 4.06     | < .001                     | 0.74            | 0.49   | 0.99   | 0.13      | 5.77        | < .001   |
| Model fit                                  | AIC                       |        | BIC      |           | CFI      |                            | RMSEA           |        | TLI    |           | SRMR        |          |
|                                            | 7358.585                  |        | 7507.063 |           | 0.997    |                            | 0.044           |        | 0.939  |           | 0.000 0.019 |          |

*Note.* AIC = Akaike information criterion; BIC = Bayesian information criterion; RMSEA = Root-mean-square error of approximation; CFI = Comparative fit index; TLI = Tucker-Lewis-Index; SRMR = Standardized root-mean-square residual.

**Table S3**

*Multilevel Structural Equation Modeling with Coefficients for Total, Direct, and Indirect Effects of Rumination, Avoidance, and Suppression on Anxiety Symptoms*

|                                     | Level 1 ( <i>within</i> ) |              |           |          |          |                 | Level 2 ( <i>between</i> ) |           |             |          |  |  |
|-------------------------------------|---------------------------|--------------|-----------|----------|----------|-----------------|----------------------------|-----------|-------------|----------|--|--|
|                                     | <i>Estimate</i>           | 95% CI       | <i>SE</i> | <i>z</i> | <i>p</i> | <i>Estimate</i> | 95% CI                     | <i>SE</i> | <i>z</i>    | <i>p</i> |  |  |
| <b>Total effect (c)</b>             |                           |              |           |          |          |                 |                            |           |             |          |  |  |
| Mindfulness → Anxiety               | -7.25                     | -10.05 -4.45 | 1.30      | -5.59    | < .001   | -7.87           | -11.72 -4.01               | 1.97      | -4.00       | < .001   |  |  |
| <b>Indirect effects (ab)</b>        |                           |              |           |          |          |                 |                            |           |             |          |  |  |
| Mindfulness → Rumination → Anxiety  | -0.66                     | -1.38 0.06   | 0.37      | -1.79    | .074     | -3.05           | -5.24 -0.86                | 1.12      | -2.73       | .006     |  |  |
| Mindfulness → Avoidance → Anxiety   | -0.60                     | -1.18 -0.01  | 0.30      | -2.00    | .045     | -0.27           | -1.86 1.32                 | 0.81      | -0.33       | .742     |  |  |
| Mindfulness → Suppression → Anxiety | 0.07                      | -0.28 0.42   | 0.18      | 0.40     | .689     | -1.06           | -2.63 0.51                 | 0.80      | -1.32       | .186     |  |  |
| <b>Direct effects (c', a, b)</b>    |                           |              |           |          |          |                 |                            |           |             |          |  |  |
| Mindfulness → Anxiety               | -6.07                     | -8.73 -3.40  | 1.36      | -4.46    | < .001   | -3.49           | -7.64 0.67                 | 2.12      | -1.65       | .100     |  |  |
| Rumination → Anxiety                | 0.76                      | -0.05 1.56   | 0.41      | 1.85     | .065     | 5.41            | 3.33 7.48                  | 1.06      | 5.11        | < .001   |  |  |
| Avoidance → Anxiety                 | 0.91                      | 0.10 1.72    | 0.41      | 2.21     | .027     | 0.46            | -2.29 3.21                 | 1.40      | 0.33        | .741     |  |  |
| Suppression → Anxiety               | -0.20                     | -1.18 0.78   | 0.50      | -0.40    | .687     | 1.88            | -0.76 4.51                 | 1.34      | 1.40        | .163     |  |  |
| Mindfulness → Rumination            | -0.87                     | -1.12 -0.62  | 0.13      | -6.73    | < .001   | -0.56           | -0.91 -0.21                | 0.18      | -3.16       | .002     |  |  |
| Mindfulness → Avoidance             | -0.65                     | -0.93 -0.38  | 0.14      | -4.71    | < .001   | -0.58           | -0.88 -0.27                | 0.16      | -3.68       | < .001   |  |  |
| Mindfulness → Suppression           | -0.36                     | -0.55 -0.16  | 0.10      | -3.56    | < .001   | -0.57           | -0.85 -0.28                | 0.15      | -3.87       | < .001   |  |  |
| Model fit                           | AIC                       |              | BIC       |          | CFI      | RMSEA           |                            | TLI       | SRMR        |          |  |  |
|                                     | 7336.274                  |              | 7488.854  |          | 0.990    | 0.035           |                            | 0.935     | 0.027 0.030 |          |  |  |

*Note.* AIC = Akaike information criterion; BIC = Bayesian information criterion; RMSEA = Root-mean-square error of approximation; CFI = Comparative fit index; TLI = Tucker-Lewis-Index; SRMR = Standardized root-mean-square residual.

**Table S4**

*Multilevel Structural Equation Modeling with Coefficients for Total, Direct and Indirect Effects of Reappraisal, Acceptance, and Problem-Solving on Anxiety Symptoms*

|                                         | Level 1 ( <i>within</i> ) |        |          |           |          |          | Level 2 ( <i>between</i> ) |        |       |           |             |          |
|-----------------------------------------|---------------------------|--------|----------|-----------|----------|----------|----------------------------|--------|-------|-----------|-------------|----------|
|                                         | <i>Estimate</i>           | 95% CI |          | <i>SE</i> | <i>z</i> | <i>p</i> | <i>Estimate</i>            | 95% CI |       | <i>SE</i> | <i>z</i>    | <i>p</i> |
| <b><i>Total effect (c)</i></b>          |                           |        |          |           |          |          |                            |        |       |           |             |          |
| Mindfulness → Anxiety                   | -7.25                     | -9.78  | -4.71    | 1.29      | -5.60    | < .001   | -8.08                      | -11.90 | -4.25 | 1.95      | -4.13       | < .001   |
| <b><i>Indirect effects (ab)</i></b>     |                           |        |          |           |          |          |                            |        |       |           |             |          |
| Mindfulness → Reappraisal → Anxiety     | -0.61                     | -1.31  | 0.08     | 0.35      | -1.73    | .083     | 1.19                       | -0.97  | 3.36  | 1.11      | 1.08        | .280     |
| Mindfulness → Acceptance → Anxiety      | -0.57                     | -1.26  | 0.13     | 0.35      | -1.60    | .111     | -6.12                      | -9.37  | -2.87 | 1.66      | -3.69       | < .001   |
| Mindfulness → Problem-Solving → Anxiety | -0.11                     | -0.54  | 0.32     | 0.22      | -0.50    | .617     | -0.08                      | -1.93  | 1.76  | 0.94      | -0.09       | .931     |
| <b><i>Direct effects (c', a, b)</i></b> |                           |        |          |           |          |          |                            |        |       |           |             |          |
| Mindfulness → Anxiety                   | -5.96                     | -8.62  | -3.30    | 1.36      | -4.39    | < .001   | -3.07                      | -7.81  | 1.67  | 2.42      | -1.27       | .205     |
| Reappraisal → Anxiety                   | -0.84                     | -1.75  | 0.07     | 0.46      | -1.81    | .071     | 1.70                       | -1.29  | 4.68  | 1.52      | 1.11        | .265     |
| Acceptance → Anxiety                    | -0.74                     | -1.61  | 0.13     | 0.44      | -1.66    | .098     | -7.74                      | -10.75 | -4.72 | 1.54      | -5.03       | < .001   |
| Problem-Solving → Anxiety               | -0.25                     | -1.20  | 0.71     | 0.49      | -0.50    | .614     | -0.12                      | -2.82  | 2.58  | 1.38      | -0.09       | .931     |
| Mindfulness → Reappraisal               | 0.73                      | 0.49   | 0.97     | 0.12      | 5.91     | < .001   | 0.70                       | 0.42   | 0.99  | 0.15      | 4.84        | < .001   |
| Mindfulness → Acceptance                | 0.77                      | 0.51   | 1.03     | 0.13      | 5.74     | < .001   | 0.79                       | 0.50   | 1.08  | 0.15      | 5.30        | < .001   |
| Mindfulness → Problem-Solving           | 0.44                      | 0.23   | 0.66     | 0.11      | 4.06     | < .001   | 0.68                       | 0.40   | 0.96  | 0.14      | 4.81        | < .001   |
| Model fit                               | AIC                       |        | BIC      |           | CFI      |          | RMSEA                      |        | TLI   |           | SRMR        |          |
|                                         | 7448.875                  |        | 7597.353 |           | 0.999    |          | 0.018                      |        | 0.987 |           | 0.000 0.016 |          |

*Note.* AIC = Akaike information criterion; BIC = Bayesian information criterion; RMSEA = Root-mean-square error of approximation; CFI = Comparative fit index; TLI = Tucker-Lewis-Index; SRMR = Standardized root-mean-square residual.

**Table S5***Multilevel Structural Equation Modeling with Effects of Study Condition on Emotion Regulation*

| Model                             | <i>Estimate</i> | [95% CI]      | <i>SE</i> | <i>z</i> | <i>p</i> |
|-----------------------------------|-----------------|---------------|-----------|----------|----------|
| <b><i>Depressive Symptoms</i></b> |                 |               |           |          |          |
| Condition → Rumination            | 0.13            | [0.13; 0.96]  | 0.336     | -0.13    | .394     |
| Condition → Avoidance             | 0.12            | [0.12; 0.98]  | 0.329     | -0.12    | .353     |
| Condition → Suppression           | 0.03            | [0.11; 0.23]  | 0.820     | -0.19    | .243     |
| Condition → Reappraisal           | 0.02            | [-0.20; 0.23] | 0.11      | 0.17     | .868     |
| Condition → Acceptance            | -0.05           | [-0.27; 0.18] | 0.11      | -0.41    | .682     |
| Condition → Problem-Solving       | -0.10           | [-0.31; 0.11] | 0.11      | -0.93    | .354     |
| <b><i>Anxiety Symptoms</i></b>    |                 |               |           |          |          |
| Condition → Rumination            | 0.13            | [-0.14; 0.39] | 0.14      | 0.93     | .353     |
| Condition → Avoidance             | 0.12            | [-0.12; 0.35] | 0.12      | 0.97     | .332     |
| Condition → Suppression           | 0.02            | [-0.20; 0.24] | 0.11      | 0.18     | .855     |
| Condition → Reappraisal           | 0.03            | [-0.19; 0.24] | 0.11      | 0.25     | .806     |
| Condition → Acceptance            | -0.06           | [-0.27; 0.16] | 0.11      | -0.50    | .617     |
| Condition → Problem-Solving       | -0.10           | [-0.31; 0.11] | 0.11      | -0.95    | .342     |

*Note.* For the MSEM analyses, the study condition was used as a between-person predictor (level 2).

**Table S6***Fixed Effect Estimates and Model Fit of Multilevel Growth Analyses for Emotion Regulation Strategies*

| Predictor                                   | Rumination                 |          | Avoidance                 |          | Suppression              |          | Reappraisal             |          | Acceptance              |          | Problem-Solving          |          |
|---------------------------------------------|----------------------------|----------|---------------------------|----------|--------------------------|----------|-------------------------|----------|-------------------------|----------|--------------------------|----------|
|                                             | <i>b</i> [95% CI]          | <i>p</i> | <i>b</i> [95% CI]         | <i>p</i> | <i>b</i> [95% CI]        | <i>p</i> | <i>b</i> [95% CI]       | <i>p</i> | <i>b</i> [95% CI]       | <i>p</i> | <i>b</i> [95% CI]        | <i>p</i> |
| (Intercept)                                 | 5.45***<br>[4.74; 6.16]    |          | 2.96***<br>[2.29; 3.62]   |          | 2.73***<br>[2.13; 3.33]  |          | 2.34***<br>[1.68, 3.00] |          | 2.26***<br>[1.59, 2.94] |          | 3.67***<br>[3.05; 4.28]  |          |
| Age                                         | -0.01<br>[-0.02; 0.00]     | .085     | 0.01<br>[0.00; 0.02]      | .115     | 0.01<br>[0.00; 0.02]     | .108     | 0.00<br>[-0.01, 0.01]   | .701     | 0.00<br>[-0.01, 0.01]   | .717     | 0.00<br>[-0.01; 0.01]    | .657     |
| Gender                                      | -0.49***<br>[-0.75, -0.23] | .001     | 0.08<br>[-0.16; 0.31]     | .504     | 0.16<br>[-0.06; 0.37]    | .157     | 0.03<br>[-0.21, 0.27]   | .814     | 0.27*<br>[0.03, 0.51]   | .028     | -0.05<br>[-0.27; 0.17]   | .664     |
| Diagnosis                                   | -0.08<br>[-0.33; 0.17]     | .543     | 0.25*<br>[0.02; 0.48]     | .031     | -0.02<br>[-0.24; 0.19]   | .848     | -0.13<br>[-0.37, 0.10]  | .260     | -0.19<br>[-0.43, 0.04]  | .105     | -0.19<br>[-0.41; 0.03]   | .082     |
| Time                                        | -0.23***<br>[-0.31, -0.14] | .001     | -0.12**<br>[-0.22, -0.03] | .008     | -0.08*<br>[-0.15, -0.01] | .018     | 0.14**<br>[0.06, 0.22]  | .001     | 0.18***<br>[0.09, 0.27] | .001     | 0.11**<br>[0.03; 0.18]   | .005     |
| Condition<br>(TAU + M vs. TAU)              | -0.26<br>[-0.68; 0.16]     | .223     | 0.07<br>[-0.35; 0.49]     | .754     | 0.01<br>[-0.34; 0.35]    | .972     | 0.02<br>[-0.38, 0.42]   | .919     | 0.16<br>[-0.25, 0.58]   | .439     | 0.45*<br>[0.08; 0.81]    | .015     |
| Condition<br>(TAU + M vs. TAU + PMR)        | -0.24<br>[-0.66; 0.18]     | .252     | -0.12<br>[-0.54; 0.30]    | .578     | 0.00<br>[-0.34; 0.34]    | .999     | 0.02<br>[-0.38, 0.42]   | .914     | 0.26<br>[-0.15, 0.68]   | .214     | 0.23<br>[-0.13; 0.60]    | .201     |
| Time × Condition<br>(TAU + M vs. TAU + PMR) | 0.06<br>[-0.06; 0.17]      | .355     | -0.09<br>[-0.21; 0.04]    | .179     | -0.03<br>[-0.12; 0.06]   | .561     | 0.00<br>[-0.12, 0.11]   | .988     | -0.05<br>[-0.17, 0.08]  | .461     | -0.11*<br>[-0.22, -0.01] | .029     |
| Time × Condition<br>(TAU + M vs. TAU + PMR) | 0.04<br>[-0.08; 0.16]      | .508     | 0.01<br>[-0.12; 0.14]     | .898     | -0.02<br>[-0.11; 0.08]   | .743     | 0.01<br>[-0.11, 0.13]   | .842     | -0.05<br>[-0.17, 0.08]  | .475     | -0.04<br>[-0.15; 0.06]   | .416     |
| AIC                                         | 1292.48                    |          | 1315.00                   |          | 1063.33                  |          | 1249.02                 |          | 1307.20                 |          | 1140.59                  |          |
| BIC                                         | 1339.48                    |          | 1361.92                   |          | 1110.33                  |          | 1296.02                 |          | 1354.21                 |          | 1187.58                  |          |
| Pseudo-R <sup>2</sup> (fixed effects)       | 0.12                       |          | 0.06                      |          | 0.04                     |          | 0.04                    |          | 0.06                    |          | 0.03                     |          |
| Pseudo-R <sup>2</sup> (total)               | 0.63                       |          | 0.50                      |          | 0.65                     |          | 0.57                    |          | 0.55                    |          | 0.59                     |          |

Note. AIC = Akaike information criterion; BIC = Bayesian information criterion. \* indicates  $p < .05$ . \*\* indicates  $p < .01$ . \*\*\* indicates  $p < .001$ .
